# Supplementary material
Source: PubMed Central journal article supplement (PMC3186387)

**Cytoplasmic N-glycosyltransferase of *Actinobacillus pleuropneumoniae* is an inverting enzyme and recognizes the N-X-S/T consensus sequence**

Flavio Schwarz<sup>1</sup>, Yao-Yun Fan<sup>1</sup>, Mario Schubert<sup>2</sup>, and Markus Aebi<sup>1</sup>  
 From Institute of Microbiology<sup>1</sup>, Institute of Molecular Biology and Biophysics<sup>2</sup>  
 Department of Biology, ETH Zurich, 8093 Zurich, Switzerland

**SUPPLEMENTARY MATERIAL**

**Supplementary Table 1**

Experimentally measured chemical shifts of the two glucosylated tamra-DANYTK peptides in comparison to observed chemical shifts for model compounds and calculated values.

| glycan unit      | nucleus       | experimental tamra-DANYTK-Glc <sup>a</sup> | Glc-β-Asn (1) <sub>b</sub> | Glc-α-Asn (1) <sub>b</sub> | experimental tamra-DANYTK-Glc <sub>3</sub> <sup>a</sup> | methyl α-isomalto-trioside (2) <sup>c</sup> | β-isomalto-triose (3)        | Glcα1,6Glc α1,6Glcβ-Asn calculated by CASPER (4) <sup>e</sup> |
|------------------|---------------|--------------------------------------------|----------------------------|----------------------------|---------------------------------------------------------|---------------------------------------------|------------------------------|---------------------------------------------------------------|
| Glc <sub>A</sub> | C1 / H1       | 82.0 / 4.96                                | 81.9                       | 79.3                       | 82.3 / 4.98                                             | 102.0 / 4.81                                | - / 4.66                     | 82.3 / 5.03                                                   |
|                  | C2 / H2       | 74.5 / 3.42                                | 74.6                       | 72.1                       | 74.4 / 3.44                                             | 74.0 / 3.56                                 | - / 3.24                     | 74.5 / 3.44                                                   |
|                  | C3 / H3       | 79.2 / 3.55                                | 79.2                       | 75.4                       | 79.5 / 3.55                                             | 76.1 / 3.65                                 | - / 3.46                     | 79.4 / 3.57                                                   |
|                  | C4 / H4       | 72.0 / 3.43                                | 72.0                       | 72.1                       | 71.9 / 3.55                                             | 72.2 / 3.50                                 | - / 3.49                     | 72.0 / 3.55                                                   |
|                  | C5 / H5       | 80.4 / 3.50                                | 80.3                       | 75.8                       | 78.7 / 3.69                                             | 72.7 / 3.82                                 | - / 3.63                     | 79.0 / 3.70                                                   |
|                  | C6 / H6 & H6' | 63.3 / 3.87 & 3.72                         | 63.3                       | 63.3                       | 68.3 / 3.97 & 3.74                                      | 68.3 / 3.99 & 3.74                          | - / 3.95 & 3.75              | 68.5 / 4.08 & 3.64                                            |
| Glc <sub>B</sub> | C1 / H1       |                                            |                            |                            | 100.7 / 4.94                                            | 100.5 / 4.96                                | - / 4.95                     | 100.6 / 4.97                                                  |
|                  | C2 / H2       |                                            |                            |                            | 74.2 / 3.57                                             | 74.0 / 3.57                                 | - / 3.56                     | 74.1 / 3.59                                                   |
|                  | C3 / H3       |                                            |                            |                            | 76.1 / 3.71                                             | 76.0 / 3.71                                 | - / 3.72                     | 76.0 / 3.73                                                   |
|                  | C4 / H4       |                                            |                            |                            | 72.3 / 3.51                                             | 72.2 / 3.51                                 | - / 3.50                     | 72.3 / 3.54                                                   |
|                  | C5 / H5       |                                            |                            |                            | 73.0 / 3.90                                             | 73.0 / 3.90                                 | - / 3.73 <sup>d</sup>        | 73.0 / 3.90                                                   |
|                  | C6 / H6 & H6' |                                            |                            |                            | 68.3 / 3.95 & 3.73                                      | 68.3 / 3.96 & 3.74                          | - / 3.96 & 3.89 <sup>d</sup> | 68.6 / 3.97 & 3.77                                            |
| Glc <sub>T</sub> | C1 / H1       |                                            |                            |                            | 100.5 / 4.95                                            | 100.5 / 4.95                                | - / 4.95                     | 100.6 / 4.96                                                  |
|                  | C2 / H2       |                                            |                            |                            | 74.2 / 3.56                                             | 74.3 / 3.54                                 | - / 3.54                     | 74.1 / 3.57                                                   |
|                  | C3 / H3       |                                            |                            |                            | 75.9 / 3.72                                             | 75.8 / 3.71                                 | - / 3.71                     | 75.8 / 3.74                                                   |
|                  | C4 / H4       |                                            |                            |                            | 72.3 / 3.43                                             | 72.2 / 3.42                                 | - / 3.41                     | 72.4 / 3.44                                                   |
|                  | C5 / H5       |                                            |                            |                            | 74.6 / 3.71                                             | 74.6 / 3.70                                 | - / 3.73                     | 74.5 / 3.73                                                   |
|                  | C6 / H6 & H6' |                                            |                            |                            | 63.2 / 3.84 & 3.76                                      | 63.2 / 3.83 & 3.75                          | - / 3.83 & 3.76              | 63.4 / 3.86 & 3.77                                            |

<sup>a</sup> Chemical shifts are referenced to DSS according to Markley *et al.* (5).

<sup>b</sup> <sup>13</sup>C chemical shifts are shifted by +1.9 ppm, original shifts were referenced to TMS via internal 1,4-dioxane.

<sup>c</sup> <sup>1</sup>H chemical shifts are shifted by +0.05 ppm, <sup>13</sup>C chemical shifts by 2.72 ppm (difference between neat TMS and DSS in H<sub>2</sub>O)

<sup>d</sup> <sup>1</sup>H chemical shifts of H5 and H6' are incorrectly assigned and need to be swapped

<sup>e</sup> <sup>13</sup>C chemical shifts are shifted by + 1.7 ppm, CASPER references to TMS

### Supplementary Figure 1

Phylogenetic tree of representative homologs of the HMW1C protein of *H. influenzae* found among proteobacteria

Homologs were identified by BLAST search and the tree was constructed with Phylogeny.fr (6). Organisms indicated in black are gamma-proteobacteria, whereas *Burkholderia xenovorans* LB400 belongs to the group of beta-proteobacteria.

### Supplementary Figure 2

*X. campestris* OGT does not modify tamra-labeled DANYTK peptide in presence of donor substrates. Reaction products were separated by Tricine-SDS-PAGE analysis and fluorescent signals were acquired by an image analyzer.

### Supplementary Figure 3

Genomic region of *A. pleuropneumoniae* AP76 encoding for *ngt*. Arrows indicate open reading frames.

### Supplementary Figure 4

NGT and  $\alpha$ 6GlcT are metal ion-independent glycosyltransferases

Tamra-labeled peptides were incubated with NGT and  $\alpha$ 6GlcT in presence or absence of EDTA. Reaction products were separated by Tricine-SDS-PAGE analysis and fluorescent signals were acquired by an image analyzer.

### Supplementary Figure 5

MALDI-MS analysis of glucosylated products shows that the glycosyltransferase  $\alpha$ 6GlcT elongates the N-linked glucose with up to six units of glucose in presence of a 1:1000 acceptor:donor ratio.

### Supplementary Figure 6

<sup>1</sup>H-<sup>13</sup>C HSQC spectra of tamra-DANYTK (A), tamra-DANYTK-glucose (B), and tamra-DANYTK-glucose<sub>3</sub> (C). In the last spectrum three different glucose species were identified: terminal glucose (Glc<sub>T</sub>), bridging glucose (Glc<sub>B</sub>) and the Asn-linked glucose (Glc<sub>A</sub>). A star denotes an impurity from the initial peptide.

### Supplementary Figure 7

MALDI-MS/MS spectrum of the precursor ion at *m/z* 1882.93 matches with fragmentation of SIVNPGGSN(Hex)LTYTIER glycopeptide

### Supplementary Figure 8

MALDI-MS/MS spectra of precursor ions corresponding to glucosylated peptides indicated in Figure 4B

A) Fragmentation of ion at *m/z*=2610.20 matches with fragmentation of YN(Hex)YNSPGFSESTGHFTQVVWK. B) Fragmentation of ion at *m/z*=2579.20 matches with fragmentation of LN(Hex)STFEDAVIPLIFSEYGCNK. C) Fragmentation of ion at *m/z*=2229.10 matches with fragmentation of LLN(Hex)SSQTATISLADGTEAFK. D) Fragmentation of ion at *m/z*=1702.78 matches with fragmentation of FHN(Hex)YTLDWAMDK. E) Fragmentation of ion at *m/z*=2966.57 matches with fragmentation of LSN(Hex)YTGQFSGALSFLNDDYEFFIR. F) Fragmentation of ion at *m/z*=2848.37 matches with fragmentation of FSSN(Hex)ETLAIYVYSHNAPLNQVVNLR. G) Fragmentation of ion at *m/z*=2188.072666.15 matches with fragmentation of SFAN(Hex)TTAFALSPPVDGFVVGK. H) Fragmentation of ion at *m/z*=1999.07 matches with fragmentation of TLGYN(Hex)TSLTLLDNHFK. I) Fragmentation of ion

at  $m/z=1869.87$  matches with fragmentation of IDADFN(Hex)ATFYSMANK. J) Fragmentation of ion at  $m/z=1813.85$  matches with fragmentation of SDAGFN(Hex)ISLSDLWAR. K) Fragmentation of ion at  $m/z=2659.32$  matches with fragmentation of ILGIDPN(Hex)VTQYTG YLDVEDEDK. L) Fragmentation of ion at  $m/z=2252.16$  matches with fragmentation of LEYLDIN(Hex)STSTTV DLYDK. M) Fragmentation of ion at  $m/z=2024.86$  matches with fragmentation of GGANFDSSSN(Hex)FSCNALK. N) Fragmentation of ion at  $m/z=2630.37$  matches with fragmentation of LAPTYQELADTYAN(Hex)ATSDVLI AK. O) Fragmentation of ion at  $m/z=2842.44$  matches with fragmentation of FAWWAEEEEGLLSNFYAYN(Hex)LTK.

### Supplementary Figure 9

LC-ESI-MS/MS analysis of the tryptic products of glucosylated AcrA

A) Spectrum from fragmentation of the doubly charged precursor ion at  $m/z=700.31$  corresponds to the peptide ATFENASKDFNR. B) Spectrum from fragmentation of the doubly charged ion at  $m/z=862.39$  matches with the glycopeptide ATFEN(Hex)ASKDFN(Hex)R. C) Spectrum from fragmentation of the doubly charged precursor ion at  $m/z=1378.21$  corresponds to the peptide AVFDNNSTLLPGAFATITSEGF IQK. D) Spectrum from fragmentation of the doubly charged ion at  $m/z=1459.24$  matches with the glycopeptide AVFDNNN(Hex)STLLPGAFATITSEGF IQK. The exact location of the hexose could not be identified.

### Supplementary References

1. Takeda, T., Sugiura, Y., Ogihara, Y., and Shibata, S. (1980) *Canadian Journal of Chemistry- Revue Canadienne De Chimie* **58**, 2600-2603
2. Hansen, P. I., Larsen, F. H., Motawia, S. M., Blennow, A., Spraul, M., Dvortsak, P., and Engelsen, S. B. (2008) *Biopolymers* **89**, 1179-1193
3. Williamson, M. P., Trevitt, C., and Noble, J. M. (1995) *Carbohydrate Research* **266**, 229-235
4. Lundborg, M., and Widmalm, G. (2011) *Anal Chem* **83**, 1514-1517
5. Markley, J. L., Bax, A., Arata, Y., Hilbers, C. W., Kaptein, R., Sykes, B. D., Wright, P. E., and Wuthrich, K. (1998) *J Biomol NMR* **12**, 1-23
6. Dereeper, A., Guignon, V., Blanc, G., Audic, S., Buffet, S., Chevenet, F., Dufayard, J. F., Guindon, S., Lefort, V., Lescot, M., Claverie, J. M., and Gascuel, O. (2008) *Nucleic Acids Res* **36**, W465-469

Supplementary Figure 1

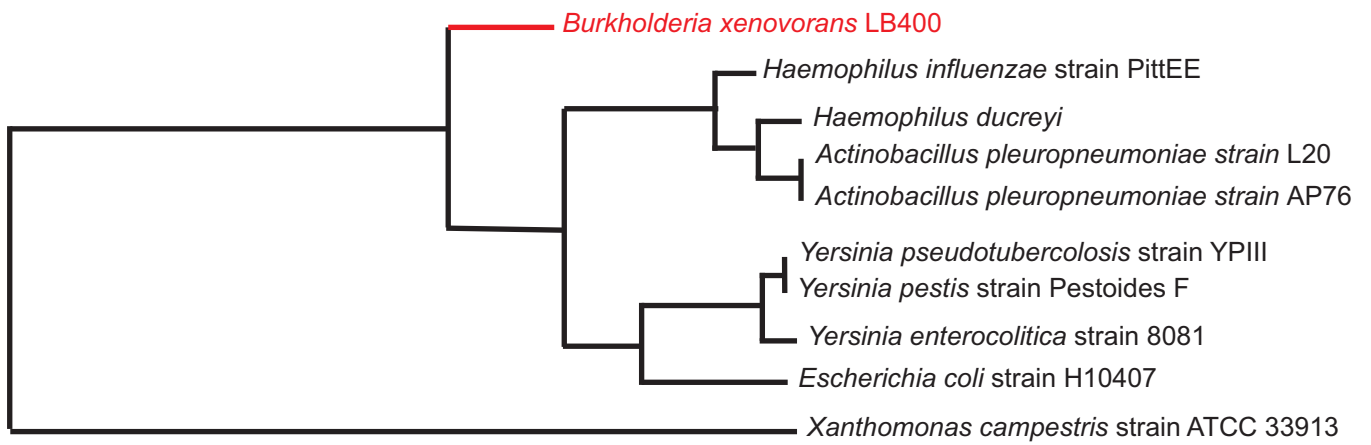

## Supplementary Figure 2

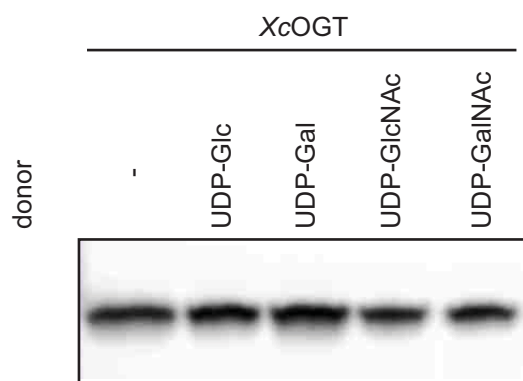

## Supplementary Figure 3

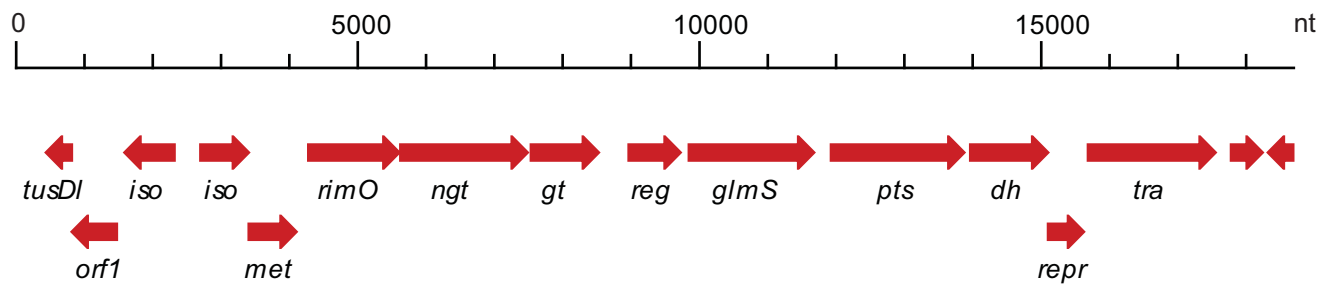

|              |                                                            |
|--------------|------------------------------------------------------------|
| <i>tusDI</i> | Sulfurtransferase TusD-like protein                        |
| <i>orf1</i>  | Putative uncharacterized protein                           |
| <i>iso</i>   | Peptidyl-prolyl cis-trans isomerase                        |
| <i>iso</i>   | Thiol-disulfide isomerase and thioredoxin                  |
| <i>met</i>   | 5'-methylthioadenosine/S-adenosylhomocysteine nucleosidase |
| <i>rimO</i>  | Ribosomal protein S12 methylthiotransferase                |
| <i>ngt</i>   | N-Glycosyltransferase                                      |
| <i>gt</i>    | Putative glycosyltransferase                               |
| <i>reg</i>   | Predicted transcriptional regulator of sugar metabolism    |
| <i>glmS</i>  | Glucosamine-fructose-6-phosphate aminotransferase          |
| <i>pts</i>   | PTS System mannitol-specific EIICBA component              |
| <i>dh</i>    | Mannitol-1-phosphate dehydrogenase                         |
| <i>repr</i>  | Mannitol operon repressor                                  |
| <i>tra</i>   | Di- and tricarboxylate transporter                         |

Supplementary Figure 4

|                |   |   |   |   |   |   |
|----------------|---|---|---|---|---|---|
| NGT            | - | + | + | + | + | - |
| $\alpha$ 6GlcT | - | - | - | + | + | - |
| EDTA           | - | - | + | - | + | - |

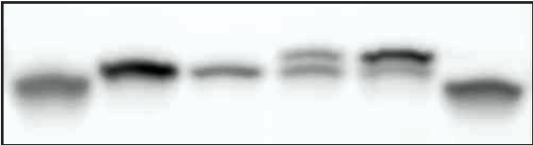

Supplementary Figure 5

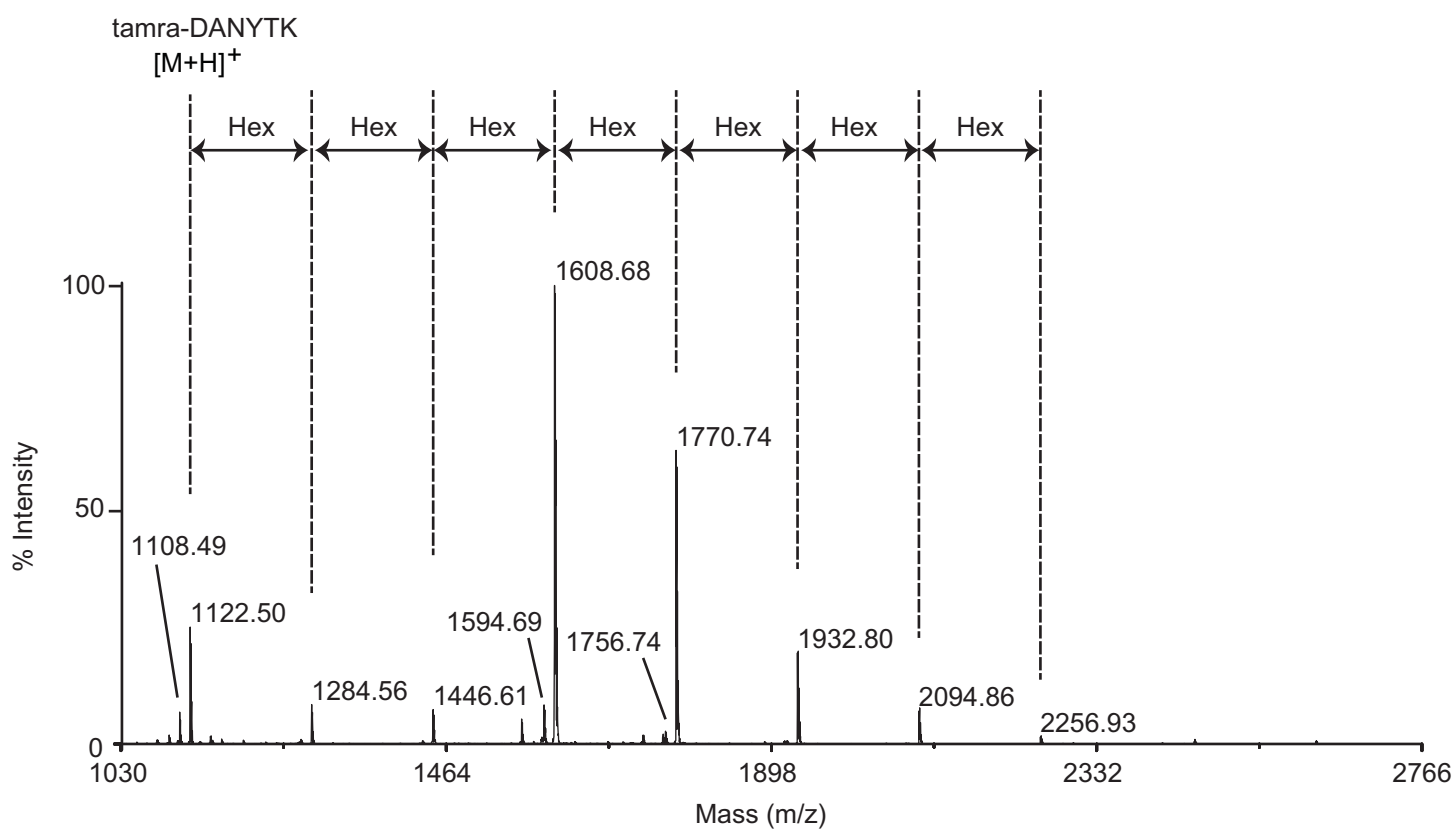



# Supplementary Figure 6

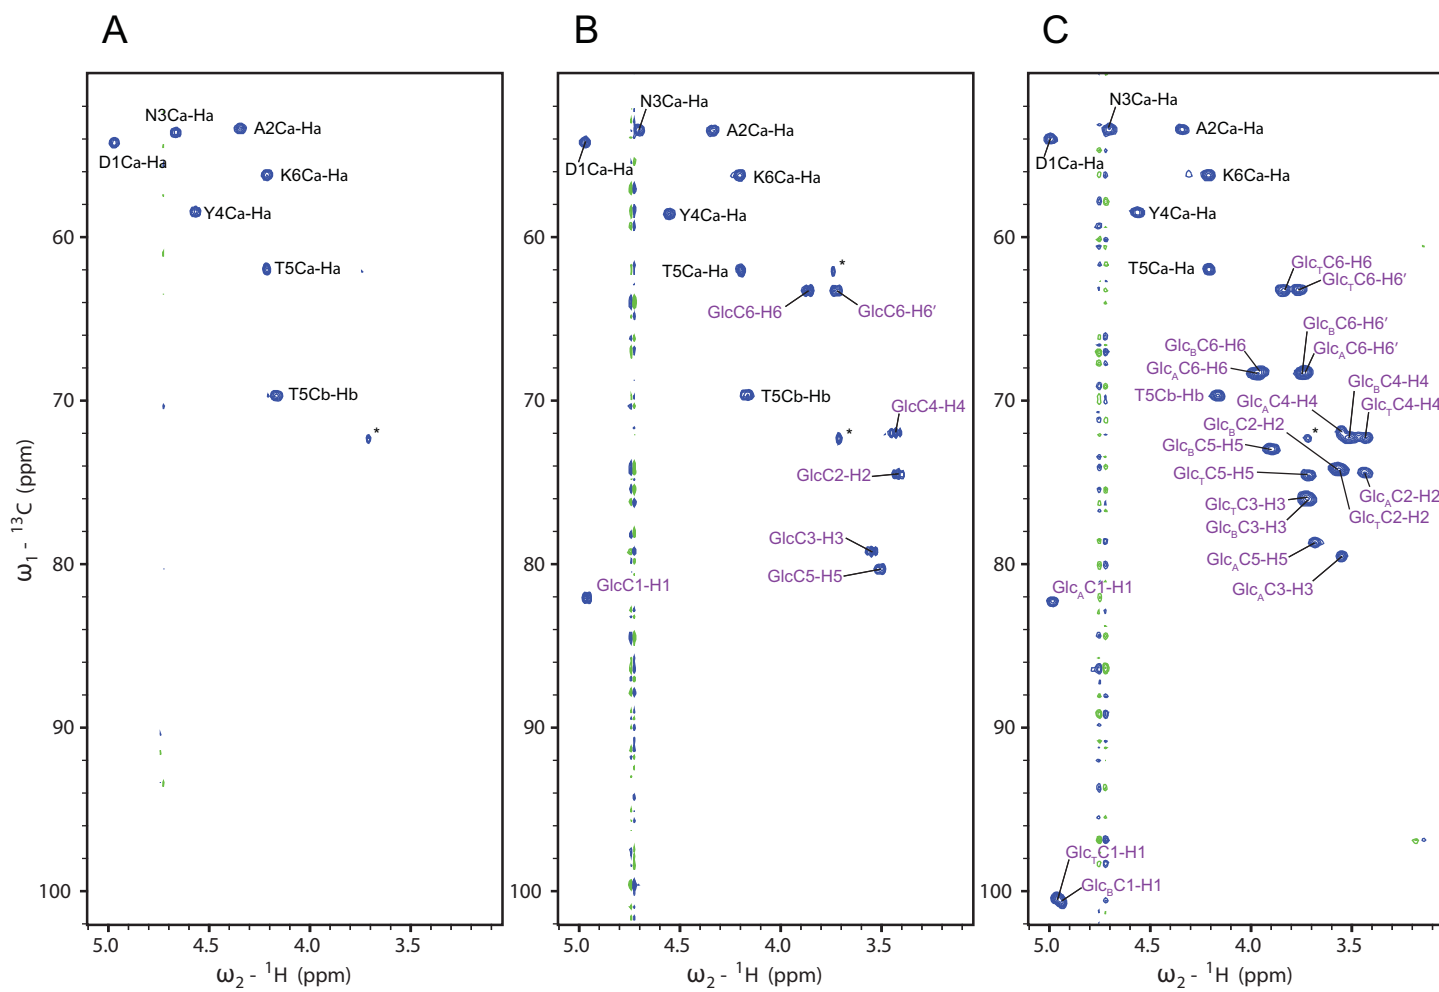

# Supplementary Figure 7

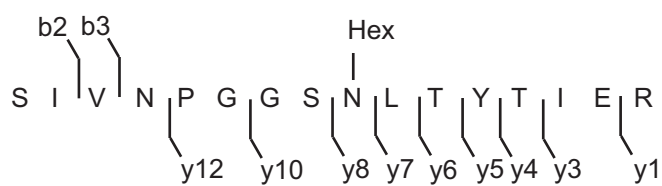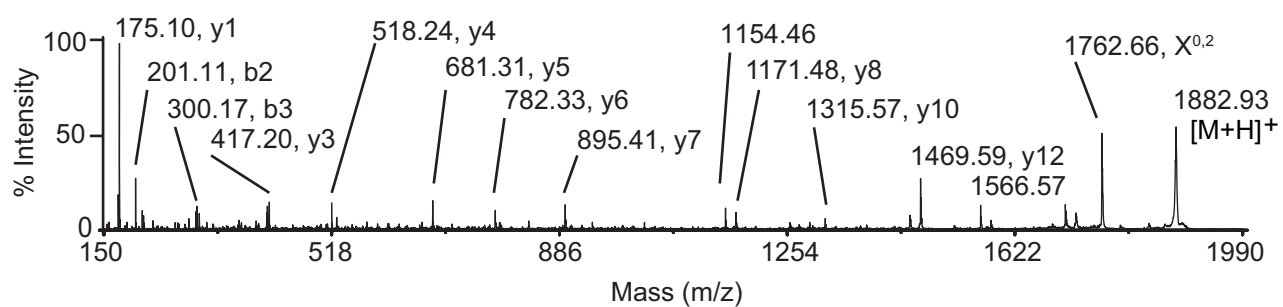

# Supplementary Figure 8

**A**

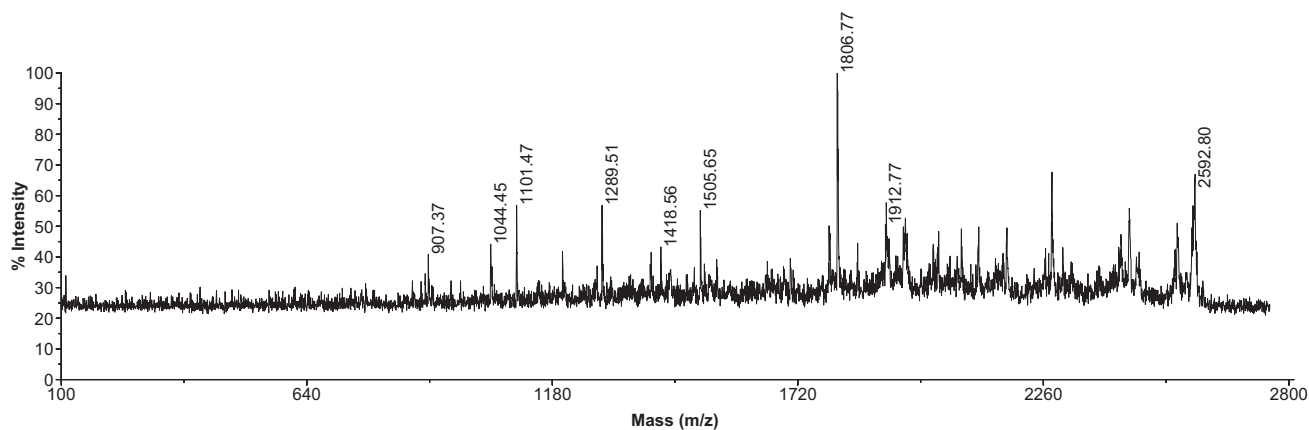

**B**

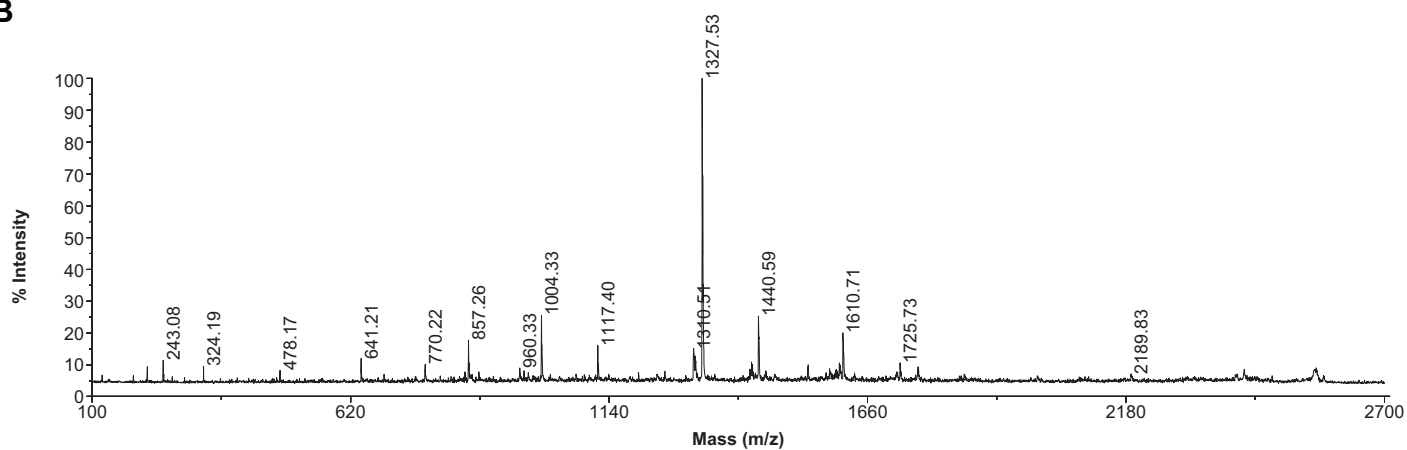

**C**

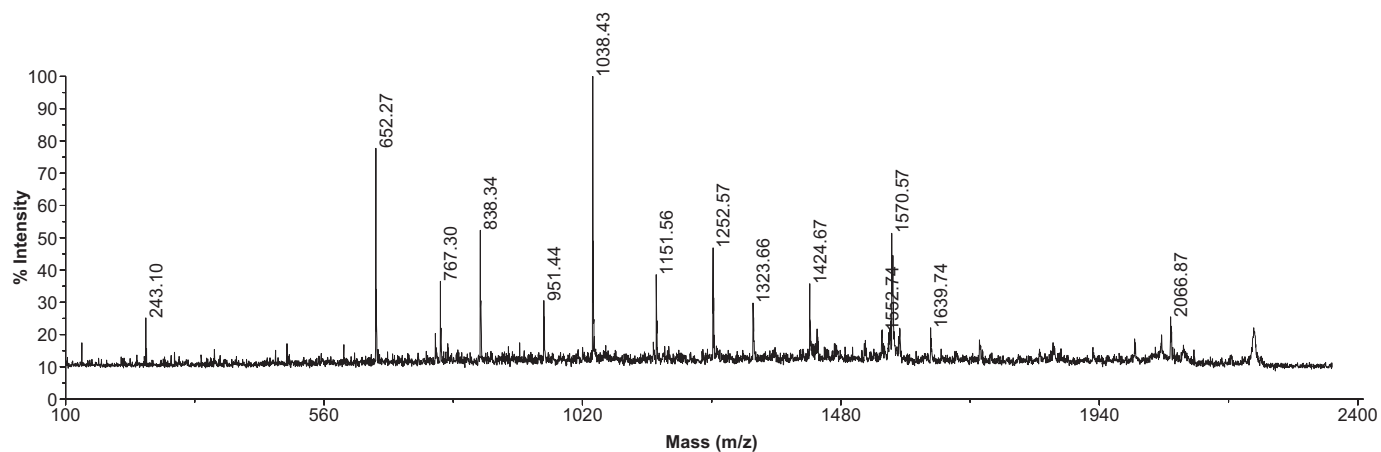

**D**

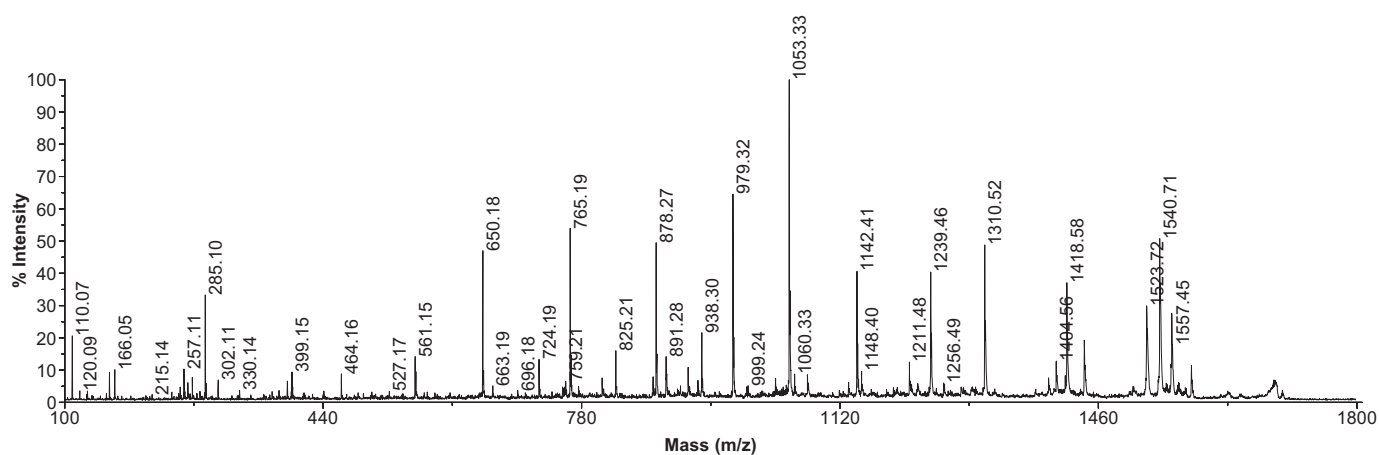

# Supplementary Figure 8

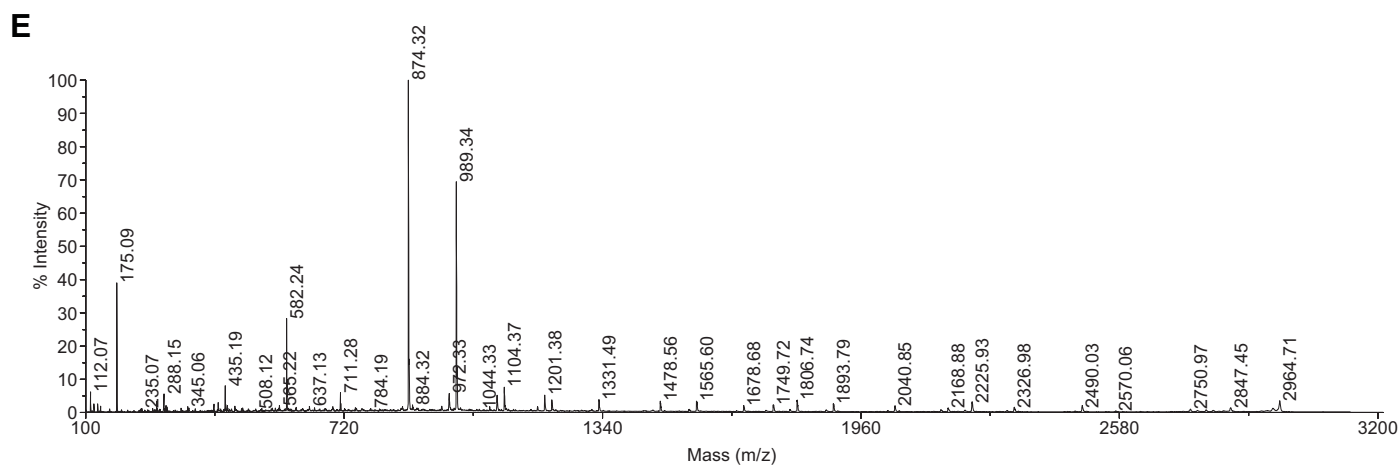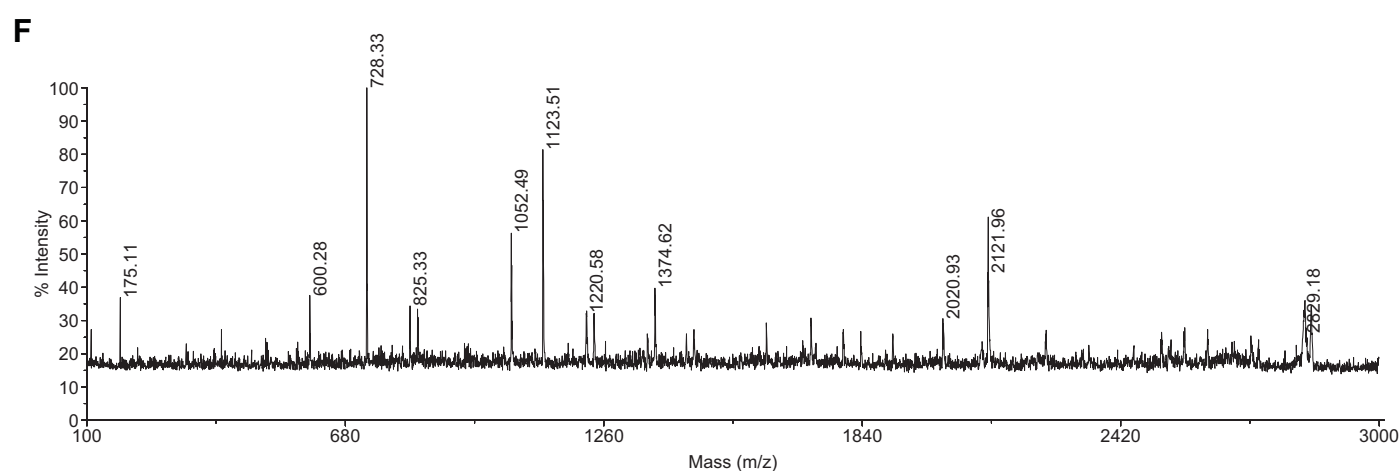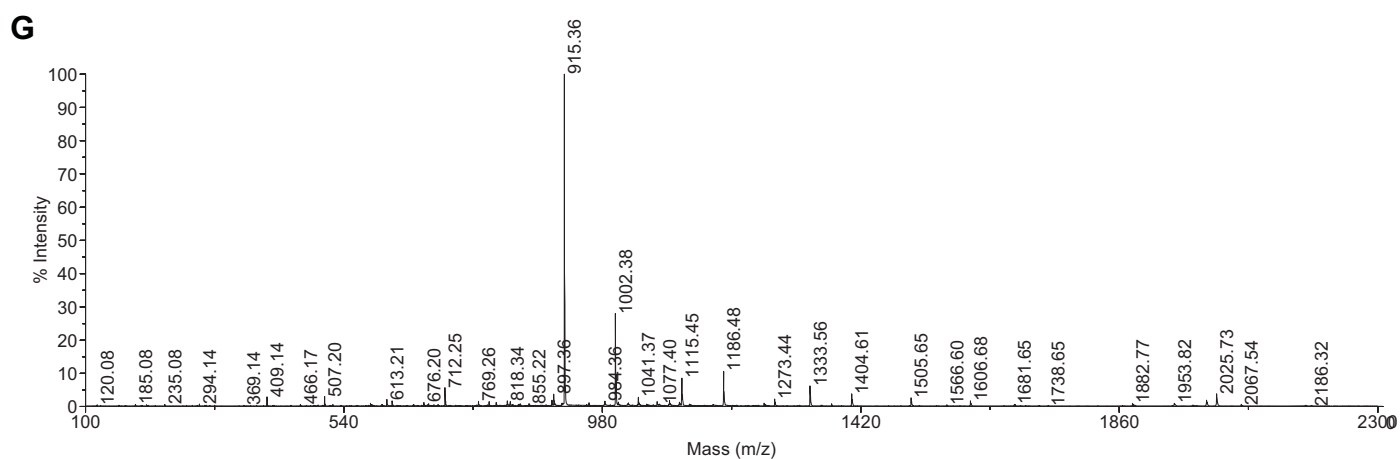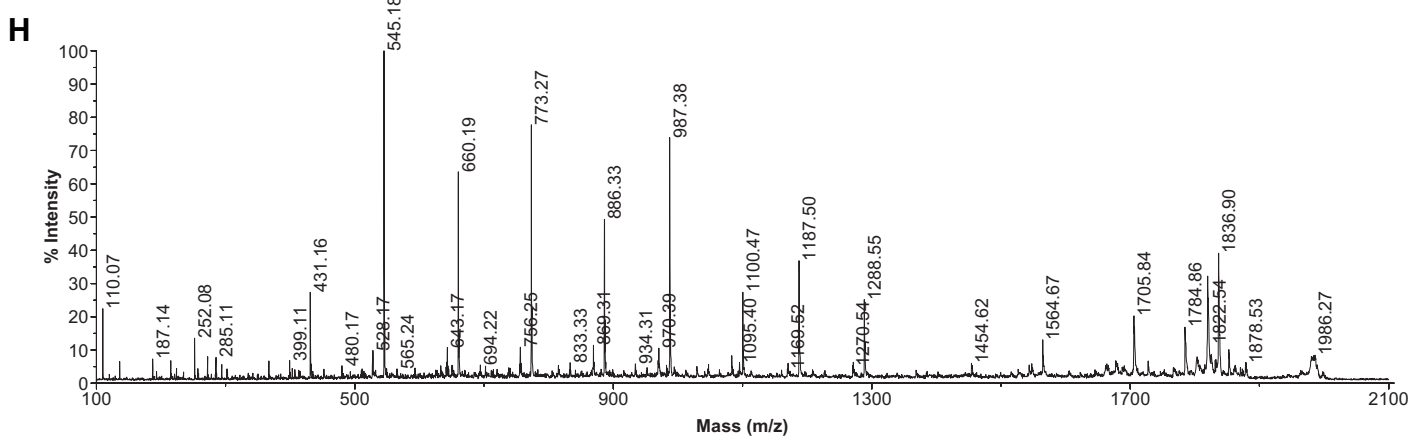

# Supplementary Figure 8

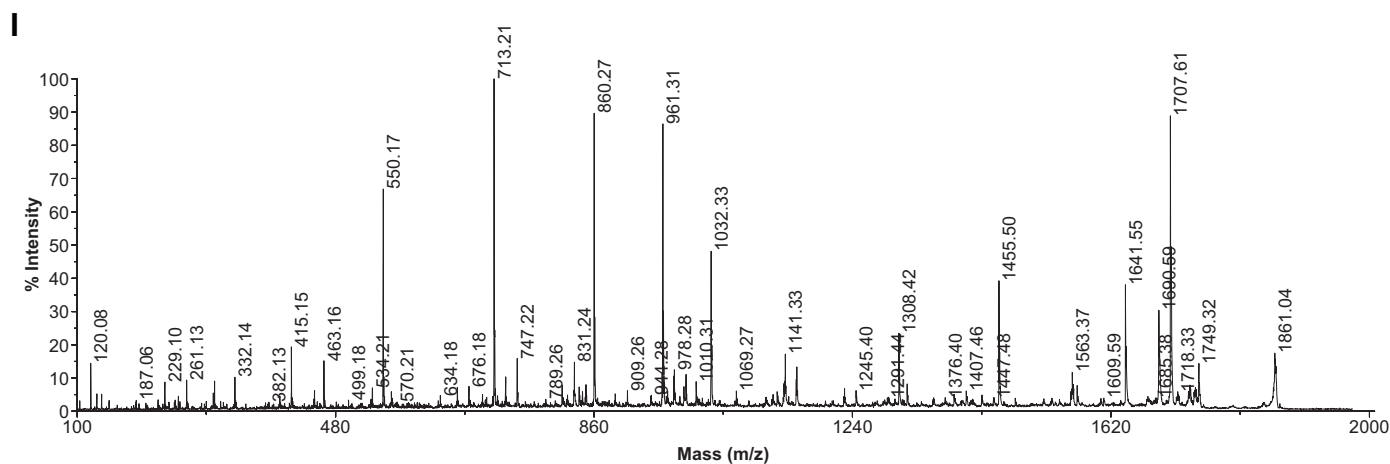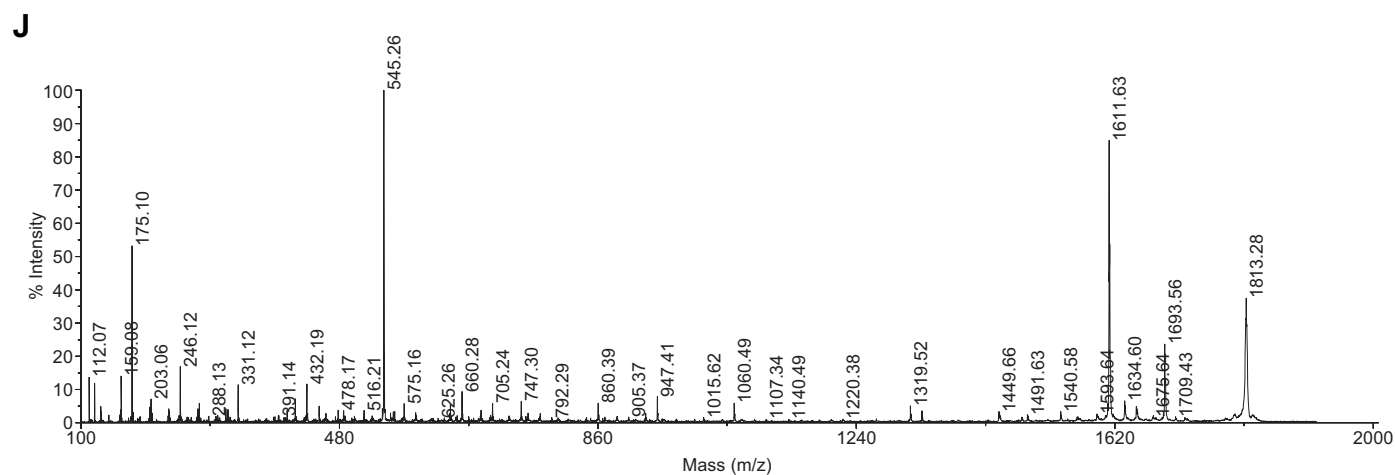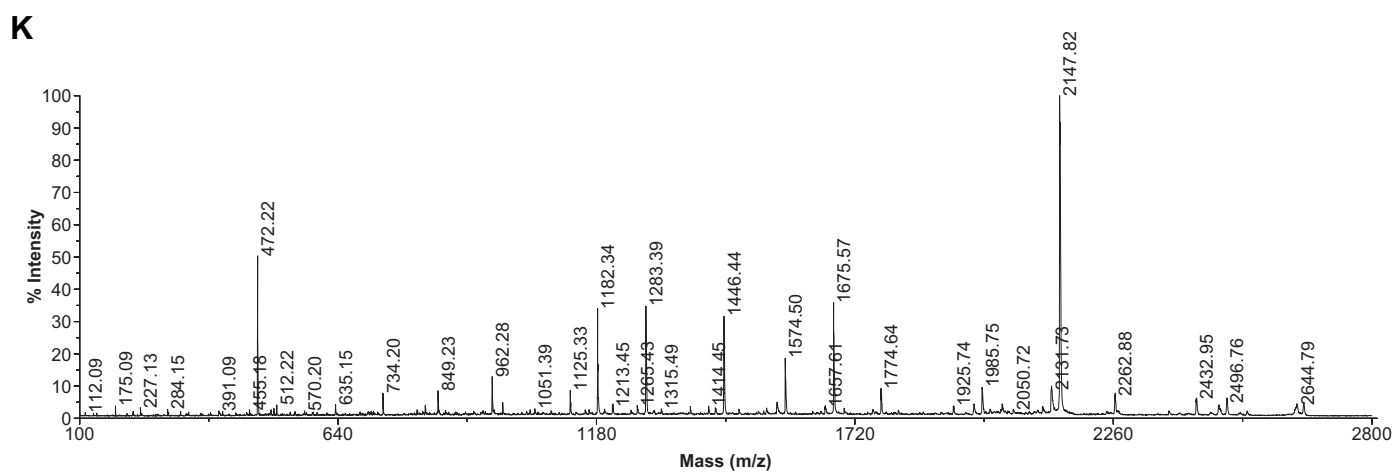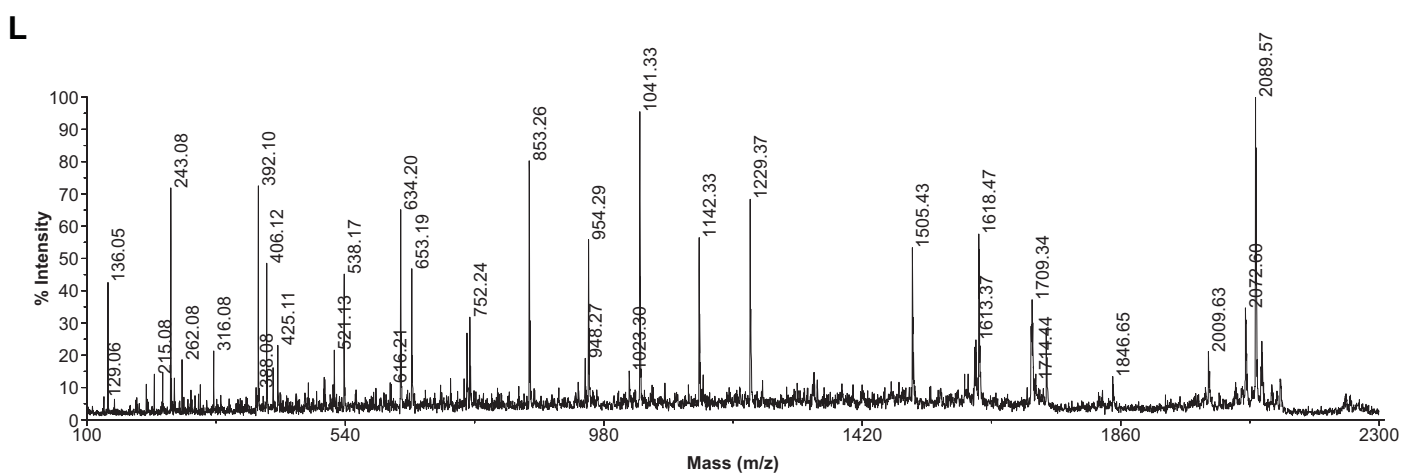

# Supplementary Figure 8

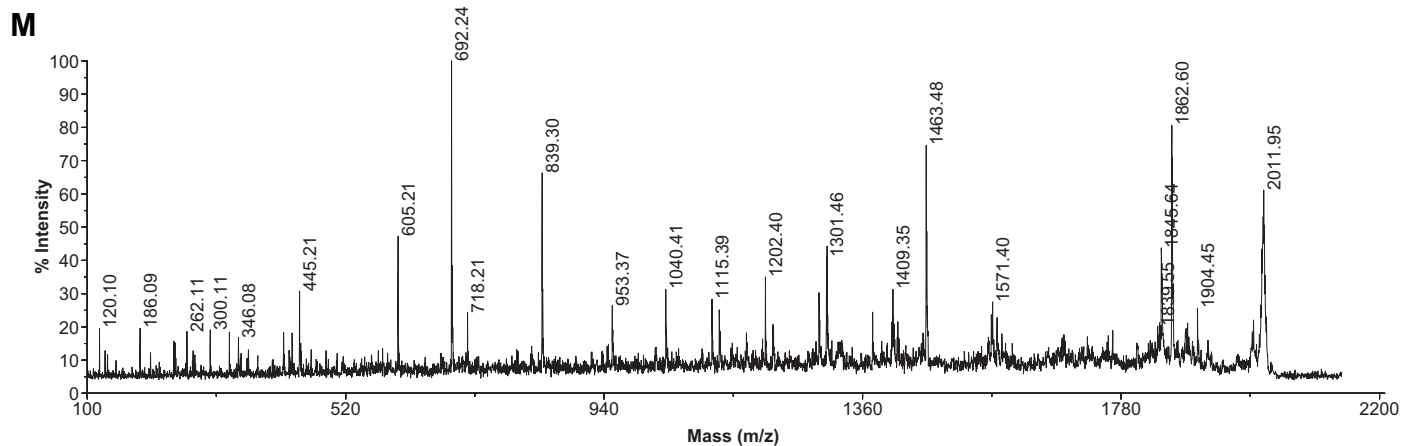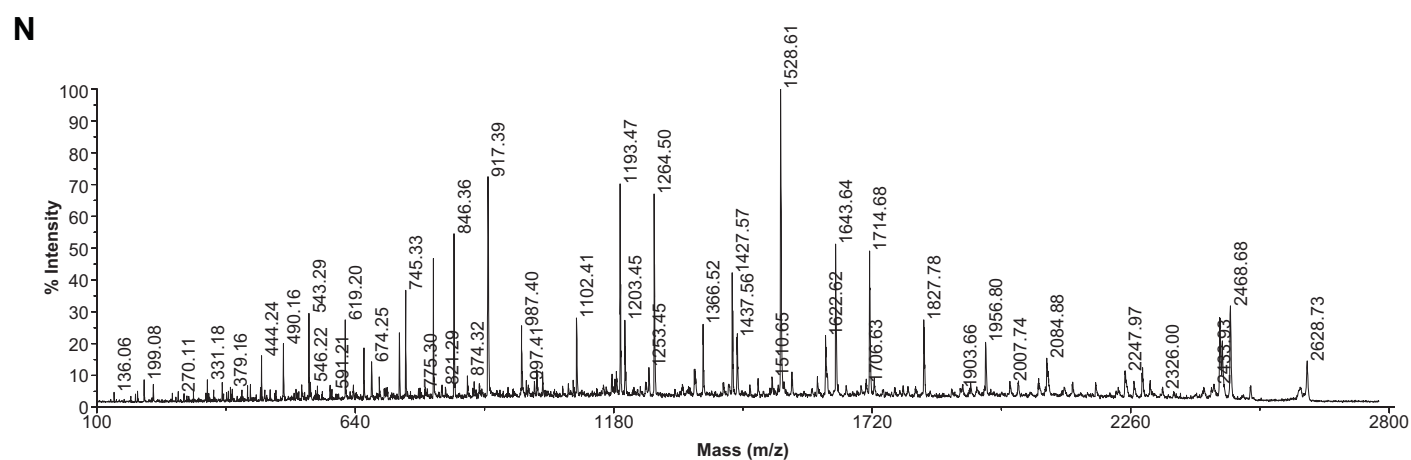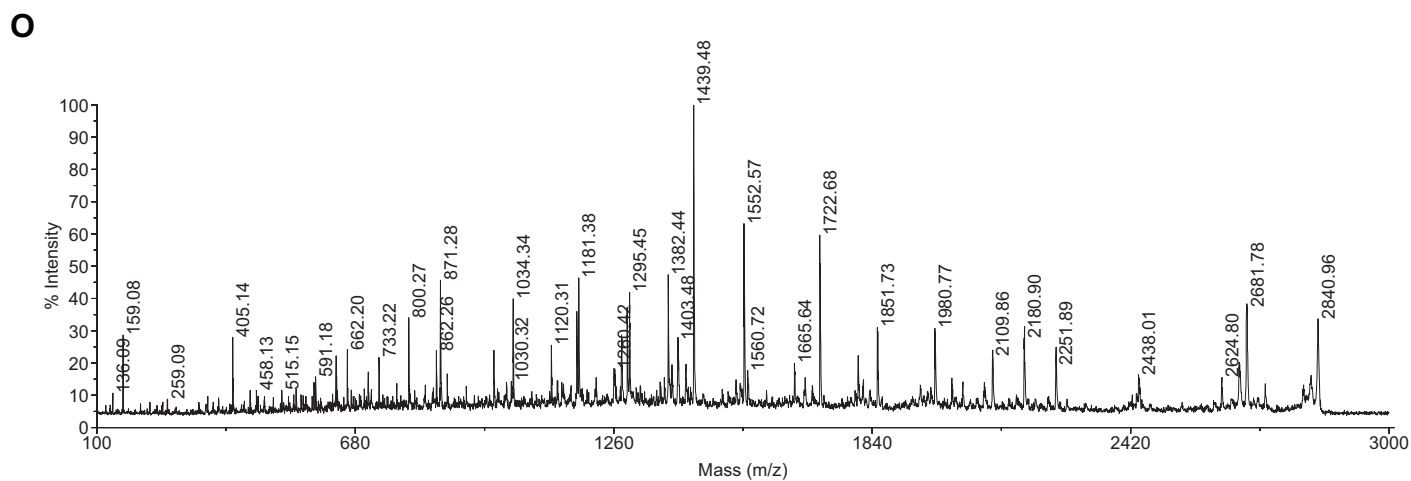

# Supplementary Figure 9

**A**

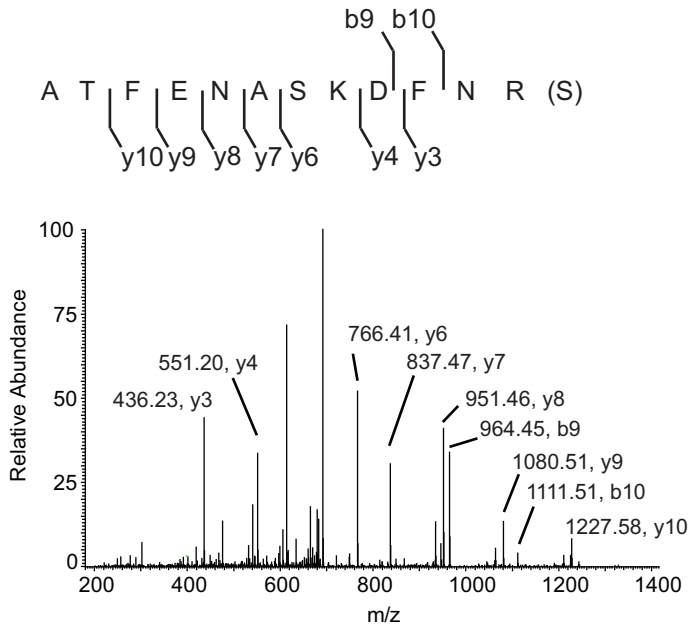

**B**

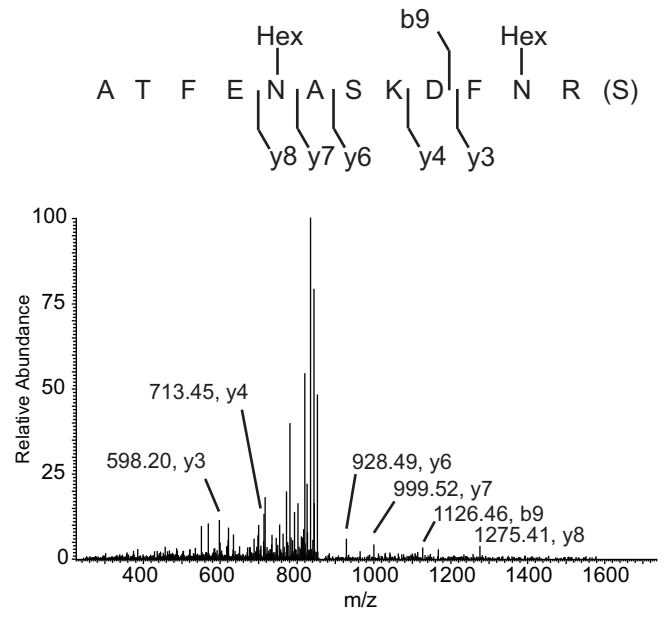

**C**

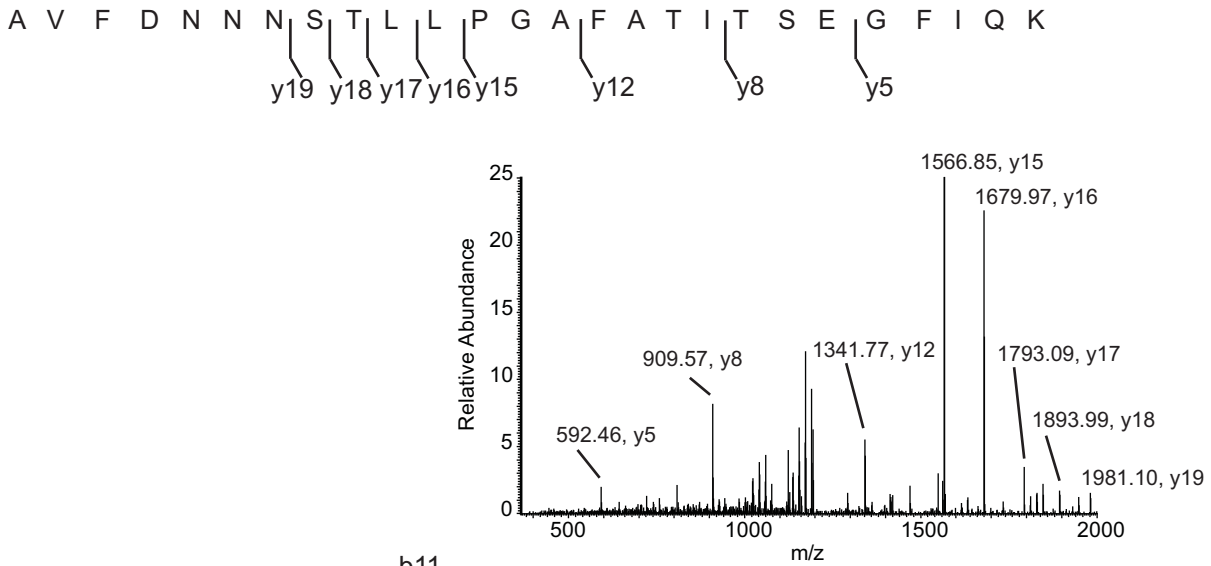

**D**

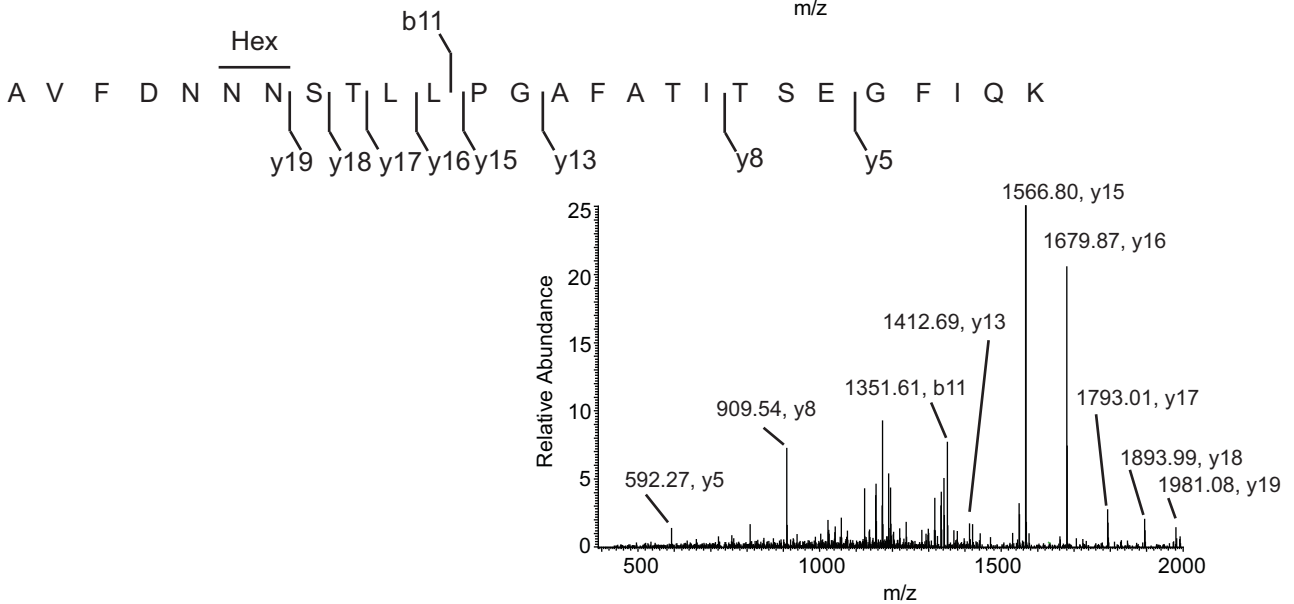

Supplement: supp_M111.277160_jbc.M111.277160-1.pdf [file supp_M111.277160_jbc.M111.277160-1.pdf]
